# Supplementary material for: The Roots of First-Generation Farmers: The Role of Inspiration in Starting an Organic Farm
Source: Preprints.org preprint supplement (doi:10.20944/preprints202305.0040.v1), 2023-05-02
Supplement: Supplementary file 1 [file supplementary]

# Supplementary Materials

**Table S1.** First and second level codes.

| Name                                  | Description                                                                                                 | Participants<br>(#) | Freq. (#) |
|---------------------------------------|-------------------------------------------------------------------------------------------------------------|---------------------|-----------|
| Environmental goals                   | Participant's goals and values toward the environment and agricultural land                                 | 39                  | 145       |
| carbon footprint                      | reduce personal contribution to fossil fuel use                                                             | 7                   | 9         |
| don't cause harm                      | not trying to achieve any grand goals, just don't leave the land worse than when you started                | 4                   | 4         |
| health                                | preventing diet-related disease or - cide sickness                                                          | 22                  | 29        |
| minimal inputs                        | put as few external resources into the system as possible; conserve resources                               | 8                   | 9         |
| mitigate degradation                  | be part of the group of farmers that's not degrading soil but mitigating env impacts of farming as a whole  | 10                  | 11        |
| no chemicals                          | chemicals are descruptive to the environment and people; don't cause pollution                              | 13                  | 16        |
| preserve-promote natural biodiversity | preserve natural systems or promote them                                                                    | 11                  | 14        |
| price premium                         | practice organic to get a higher price for products                                                         | 1                   | 1         |
| regenerative                          | create healthy soils, not deplete them                                                                      | 12                  | 18        |
| responsible                           | personal responsibility to sustainability                                                                   | 3                   | 4         |
| show it can be done                   | set an example that minimum inputs works, you can grow food without being destructive                       | 6                   | 6         |
| spread the movement                   | inspire other people to be small farmers                                                                    | 1                   | 1         |
| support life on earth                 | reverse the current path of environmental degradation to support future generations                         | 9                   | 9         |
| waste reduction                       | reduce contribution to landfill                                                                             | 1                   | 1         |
| work with nature                      | work with nature's natural cycles and ecosystems instead of against it and trying to control and manipulate | 12                  | 13        |

Table S1. Continued.

| Name                    | Description                                                                | Participants<br>(#) | Freq. (#) |
|-------------------------|----------------------------------------------------------------------------|---------------------|-----------|
| Finances                | The financial components that had to come together to make the farm happen | 38                  | 76        |
| bank loans              | received a loan from a bank                                                | 2                   | 2         |
| cosign loan             | had someone else cosign to get a loan                                      | 3                   | 3         |
| credit card debt        | spends for farm on credit cards                                            | 3                   | 4         |
| second job              | has second job                                                             | 6                   | 6         |
| family land             | inherited family land                                                      | 4                   | 4         |
| family loans            | family provided loan                                                       | 7                   | 7         |
| growing slow            | growing slowly so no large up-front capital necessary                      | 7                   | 7         |
| inheritance             | inherited money                                                            | 1                   | 1         |
| investments             | used capital gained from investments                                       | 1                   | 1         |
| lease                   | got a lease instead of buying                                              | 2                   | 2         |
| loans                   | got a loan, but source unclear                                             | 1                   | 1         |
| no debt                 | debt averse                                                                | 1                   | 1         |
| not about profit        | costs aren't as important as mission                                       | 1                   | 1         |
| raise start-up capital  | did a go fund me or some fundraising to get funds                          | 3                   | 3         |
| second income           | another person in the household has income                                 | 8                   | 8         |
| small start-up costs    | low start-up costs from the beginning                                      | 2                   | 2         |
| sold house for profit   | sold a house that had appreciated over time and used profit                | 5                   | 5         |
| USDA loan               | Received a loan from USDA                                                  | 2                   | 2         |
| Inspiration             | What inspired the farmer to start their farm                               | 38                  | 62        |
| Book, program or course | The farmer read a book, enrolled in a program or course that inspired them | 16                  | 27        |
| Other farms             | The farmer saw other farms succeeding                                      | 29                  | 35        |
| Personal satisfactions  | The benefits that a farmer received from farming                           | 34                  | 76        |
| beautiful               | enjoy looking at a beautiful farm                                          | 3                   | 3         |
| being grounded          | farming keeps them in the moment                                           | 2                   | 2         |
| being happy             | farming makes them happy                                                   | 2                   | 2         |
| being outside           | enjoy being outside                                                        | 6                   | 6         |

Table S1. Continued

| Name                       | Description                                                    | Participants<br>(#) | Freq. (#) |
|----------------------------|----------------------------------------------------------------|---------------------|-----------|
| beneficial lifestyle       | love health benefits of farming                                | 4                   | 4         |
| brave                      | get to be an image of bravery                                  | 1                   | 1         |
| offering at-risk ppl a job | hiring at-risk populations                                     | 1                   | 1         |
| eat fresh food             | enjoy eating fresh food                                        | 4                   | 4         |
| emotional attachment       | feel an emotional attachment to land                           | 1                   | 1         |
| feeding people             | enjoy feeding others                                           | 5                   | 5         |
| feeling accomplished       | feel good after a hard day's work                              | 3                   | 3         |
| finding balance            | escaping the stress of traditional "work"                      | 1                   | 1         |
| food movement              | knowing you are doing positive work                            | 1                   | 1         |
| happy customers            | seeing customers enjoy their food or company or the experience | 12                  | 12        |
| having good time           | having a good time working on a farm                           | 1                   | 1         |
| helping environment        | contributing to a healthier physical environment               | 2                   | 2         |
| learning                   | love to learn something new every day                          | 3                   | 3         |
| less stress                | less stress than a traditional desk job                        | 2                   | 2         |
| making money               | enjoy making money doing something they love                   | 1                   | 1         |
| no office job              | don't have to be indoors, sitting at a desk                    | 4                   | 4         |
| pleasing others            | seeing others enjoy their farm/food/etc                        | 1                   | 1         |
| seeing family enjoy        | seeing their family enjoy the farm and food benefits           | 2                   | 2         |
| learning                   | love to learn something new every day                          | 3                   | 3         |
| less stress                | less stress than a traditional desk job                        | 2                   | 2         |
| making money               | enjoy making money doing something they love                   | 1                   | 1         |
| no office job              | don't have to be indoors, sitting at a desk                    | 4                   | 4         |
| pleasing others            | seeing others enjoy their farm/food/etc                        | 1                   | 1         |

Table S1. Continued.

| Name                                 | Description                                                                                  | Participants<br>(#) | Freq. (#) |
|--------------------------------------|----------------------------------------------------------------------------------------------|---------------------|-----------|
| seeing family enjoy                  | seeing their family enjoy the farm and food benefits                                         | 2                   | 2         |
| seeing food grow                     | watching the growing process from seed to harvest                                            | 12                  | 13        |
| teach others                         | enjoy being a teacher and educator                                                           | 1                   | 1         |
| Fairness                             | Balancing fairness to customers and farm finances                                            | 37                  | 61        |
| accessible                           | want food to be accessible to all income levels                                              | 4                   | 4         |
| calculate out                        | use spreadsheets to calculate food prices                                                    | 1                   | 1         |
| customers will pay                   | a fair price is one customers are willing to pay for                                         | 13                  | 13        |
| difficult to sell at premium         | would like to set a higher price but can't sell it                                           | 4                   | 4         |
| donate                               | donate extra food to food banks or other charities                                           | 5                   | 5         |
| don't charge enough                  | feel like prices are a little low and they could get more                                    | 2                   | 2         |
| don't want to undercut other farmers | don't want to de-value another farmer's prices by charging less                              | 6                   | 6         |
| efficiency helps                     | being more efficient behind the scenes help lower prices and increase profit margins         | 1                   | 1         |
| feel bad selling high                | sell high to make a living but feel bad doing it and doesn't want to do it                   | 2                   | 2         |
| food shouldn't be cheap              | people are used to cheap food at the grocery store because of subsidies, but it shouldn't be | 2                   | 2         |
| hard to set price                    | still navigating how to be fair                                                              | 2                   | 2         |
| have to make a living                | maybe would lower prices but can't afford it to survive                                      | 6                   | 7         |
| modest income                        | can keep prices low because income is low                                                    | 1                   | 1         |
| profitable                           | a fair price is one that customers are willing to pay                                        | 4                   | 5         |
| specialty items                      | have to charge more for items difficult to produce                                           | 1                   | 1         |
| want to sell cheap                   | want to sell at lower price but have to make a living                                        | 1                   | 1         |

Table S1. Continued.

| Name                                   | Description                                                                                 | Participants<br>(#) | Freq. (#) |
|----------------------------------------|---------------------------------------------------------------------------------------------|---------------------|-----------|
| worth hard work                        | higher prices are worth the hard work that went into producing it                           | 4                   | 4         |
| Risk                                   |                                                                                             | 36                  | 142       |
| aging                                  | ageing bodies are prone to injury                                                           | 1                   | 1         |
| community<br>connectedness             | risk of being isolated                                                                      | 3                   | 3         |
| community<br>relationships buffer      | already know people in community                                                            | 2                   | 2         |
| confidence buffer                      | confident in production practices to take the leap                                          | 4                   | 6         |
| crop fails                             | risk of crop failing for any of a multitude of reasons                                      | 6                   | 6         |
| debt                                   | risk of getting deep into debt                                                              | 5                   | 5         |
| disappointing others                   | business fails and can't repay<br>don't want to let people down who believed in them        | 1                   | 1         |
| experience buffer                      | have experience so know what they're getting into                                           | 3                   | 3         |
| failure                                | fear of failure and risking<br>embarrassment to everyone who knew they were starting a farm | 5                   | 6         |
| finding employees                      | worried they won't have anyone to hire                                                      | 1                   | 1         |
| hard work                              | worried it will be too much physical work                                                   | 1                   | 1         |
| income<br>diversification as<br>buffer | planned for multiple revenue streams to buffer financial risk                               | 9                   | 9         |
| inexperience                           | risk of having little to no practical farming experience                                    | 5                   | 9         |
| lack of knowledge                      | there's some information they just don't know                                               | 2                   | 2         |
| location                               | might pick a location that's not good for growing on                                        | 1                   | 1         |
| losing land                            | could lose gifted or leased land                                                            | 1                   | 1         |
| losing pride                           | feel ashamed if they fail                                                                   | 3                   | 3         |
| money                                  | losing money                                                                                | 12                  | 14        |
| naive                                  | too idealistic                                                                              | 3                   | 3         |
| nature                                 | natural catastrophe, pest or disease outbreak                                               | 2                   | 2         |
| new community                          | not knowing anyone                                                                          | 3                   | 3         |

|               |                                                              |   |   |
|---------------|--------------------------------------------------------------|---|---|
| no going back | not being able to go back to previous career once they leave | 1 | 1 |
|---------------|--------------------------------------------------------------|---|---|

Table S1.

| Name                     | Description                                                                   | Participants (#) | Freq. (#) |
|--------------------------|-------------------------------------------------------------------------------|------------------|-----------|
| no market                | risk of having no one to sell to                                              | 10               | 10        |
| not producing enough     | risk of having a large market but not enough to sell                          | 3                | 3         |
| nothing grows            | risk of nothing growing on land                                               | 1                | 1         |
| nothing to lose          | no risk, nothing to lose                                                      | 2                | 2         |
| outside income buffer    | buffered by another source of income                                          | 6                | 7         |
| overconfident            | was confident but probably shouldn't have been                                | 2                | 2         |
| physical injury          | risk of getting injured and no one to take over the work                      | 4                | 7         |
| regret                   | risk of failing and thinking they didn't try hard enough                      | 2                | 2         |
| risk averse              | wouldn't have done it if they thought there was a lot of risk                 | 3                | 4         |
| slow as buffer           | grow slowly to avoid large financial risks                                    | 3                | 3         |
| specialty crops          | risk of growing all specialty crops because if it fails that's your only crop | 1                | 1         |
| stubborn                 | unwilling to give up or quit                                                  | 1                | 1         |
| unreliable market        | risk of inconsistent customer base                                            | 3                | 3         |
| wasted time              | nothing to lose except the time "wasted" on the endeavor                      | 3                | 3         |
| weather                  | weather events like hurricanes, tornadoes, rain, dry spells, etc              | 7                | 8         |
| weeds                    | risk of having weeds take over farm                                           | 2                | 2         |
| Why farming              | Why the person decided to start a farm                                        | 40               | 234       |
| Challenge                | Enjoy a challenge                                                             | 4                | 4         |
| College job              | Got a job in college and ended up liking it                                   | 5                | 6         |
| Connect to land          | wanted to be closer to nature                                                 | 5                | 5         |
| Didn't like previous job | Wanted to leave job because they were unhappy                                 | 13               | 16        |
| Educate                  | Wanted to be able to teach others about benefits of farming                   | 3                | 3         |
| enjoyable                | They enjoy it                                                                 | 16               | 17        |

|               |                                                                                                    |   |   |
|---------------|----------------------------------------------------------------------------------------------------|---|---|
| enlightenment | They felt like they an "aha" moment and realized they needed to be involved in the "food movement" | 5 | 7 |
|---------------|----------------------------------------------------------------------------------------------------|---|---|

Table S1. Continued.

| Name                   | Description                                                                                      | Participants (#) | Freq. (#) |
|------------------------|--------------------------------------------------------------------------------------------------|------------------|-----------|
| Family history         | Old family history of farming and wanted to connect back to that (skipped 1 or more generations) | 3                | 3         |
| Family values          | Wanted to promote healthy family dynamics like spending time together at home and outside        | 8                | 8         |
| Fate                   | Found it at exactly the right time in life like an intervention                                  | 3                | 3         |
| good at it             | Found out they were good at it                                                                   | 2                | 2         |
| Grow good food         | Want to grow healthy, nutritious food                                                            | 8                | 8         |
| Happiness              | Want to be happy                                                                                 | 1                | 1         |
| help environment       | Want to be a positive influence on physical environment                                          | 12               | 16        |
| Idealistic             | Committed to ideals of sustainability and sustainable agriculture                                | 1                | 1         |
| Improve health         | Improve personal health like physical ailments                                                   | 9                | 9         |
| Improve public health  | Promote healthy communities, not just themselves and their family                                | 5                | 5         |
| in control             | have control over their day and life                                                             | 1                | 1         |
| independence           | wanted to be their own boss, work on their own schedule and run a business on their terms        | 16               | 21        |
| love to learn          | love to learn something new every day                                                            | 1                | 1         |
| make a difference      | want to make a positive impact on the world of sustainable agriculture                           | 5                | 5         |
| meaningful             | find they are doing something that makes a difference                                            | 3                | 3         |
| Necessity              | Had to make an income to started farming                                                         | 2                | 2         |
| Other farms succeeding | Saw others doing it and doing it well                                                            | 5                | 5         |
| Part of identity       | Felt like it was always part of them                                                             | 1                | 1         |
| Passion                | Love it and couldn't imagine doing anything else                                                 | 3                | 3         |
| rewarding              | see the fruits of your labor in the field after hard work                                        | 4                | 4         |

Table S1. Continued.

| Name                              | Description                                                                                      | Participants<br>(#) | Freq. (#) |
|-----------------------------------|--------------------------------------------------------------------------------------------------|---------------------|-----------|
| satisfying                        | feeling like a day's work well done                                                              | 2                   | 3         |
| spiritual                         | connect to land through spirituality                                                             | 1                   | 1         |
| Studied in college                | Found farming in college courses                                                                 | 1                   | 1         |
| Transition from<br>gardening      | Had a garden or parents had a<br>garden so it was something they<br>"knew"                       | 9                   | 9         |
| transition from<br>restaurant biz | found farming through working in<br>restaurant kitchens                                          | 2                   | 2         |
| variety                           | love being able to do a variety of<br>activities as part of one job, always<br>new, never boring | 7                   | 7         |
| Want to be an<br>inspiration      | want to show others that they can<br>do it too                                                   | 2                   | 2         |
| Want to be outdoors               | love being outside                                                                               | 21                  | 29        |
| Want to change<br>system          | want to contribute to a sustainable<br>ag system                                                 | 7                   | 8         |
| want to feed people               | want to offer good food to people                                                                | 6                   | 6         |
| Wanted to start a<br>biz          | Was going to start a business<br>anyway                                                          | 5                   | 5         |
| WOOF                              | Had no direction, wanted to travel so<br>enrolled in WOOF and fell in love<br>with farming       | 1                   | 1         |



**Table S2.** Educational-related sources of inspiration.

| Education Descriptor | Participants (#) | Freq. (#) |
|----------------------|------------------|-----------|
| aquaponics           | 2                | 2         |
| beyond sustainable   | 1                | 1         |
| biodynamic           | 1                | 1         |
| climate              | 1                | 1         |
| composting           | 1                | 1         |
| cover crops          | 1                | 1         |
| crop spacing         | 1                | 1         |
| ecosystem            | 1                | 1         |
| energy conservation  | 1                | 1         |
| expanding            | 1                | 1         |
| opportunities        |                  |           |
| good food            | 1                | 1         |
| hoop houses          | 1                | 1         |
| organic              | 3                | 3         |
| permaculture         | 1                | 1         |
| practices            | 1                | 1         |
| profitable           | 8                | 9         |
| raised beds          | 1                | 1         |
| soil management      | 2                | 2         |
| urban ag             | 1                | 1         |
| variety selection    | 1                | 1         |
| water conservation   | 1                | 1         |
| worms                | 1                | 1         |

**Table S3.** Farmer-related sources of inspiration.

| Education Descriptor   | Participants (#) | Freq. (#) |
|------------------------|------------------|-----------|
| aesthetically pleasing | 1                | 1         |
| authentic              | 2                | 2         |
| committed              | 1                | 1         |
| confident              | 1                | 1         |
| disciplined            | 2                | 3         |
| eclectic               | 1                | 1         |
| efficient              | 2                | 2         |
| encouraging            | 2                | 2         |
| experienced            | 1                | 1         |
| generous               | 5                | 5         |
| good at budgeting      | 1                | 1         |
| good at                | 1                | 1         |
| compartmentalizing     |                  |           |
| good communicator      | 1                | 1         |
| hard worker            | 1                | 1         |
| innovative             | 1                | 1         |
| inspiring              | 2                | 2         |
| knowledgeable          | 3                | 4         |
| organized              | 1                | 1         |
| persistent             | 1                | 1         |
| risk taker             | 1                | 1         |
| successful             | 2                | 2         |
| the bomb               | 1                | 1         |
| willing to help        | 2                | 2         |
| work ethic             | 1                | 1         |
